# Supplementary material for: Expression of HNF4G and its potential functions in lung cancer
Source: PubMed Central journal article supplement (PMC5915054; doi:10.18632/oncotarget.22933), 2017-12-04
Supplement: oncotarget-09-18018-s001.pdf [file oncotarget-09-18018-s001.pdf]

## Expression of HNF4G and its potential functions in lung cancer

### SUPPLEMENTARY MATERIALS

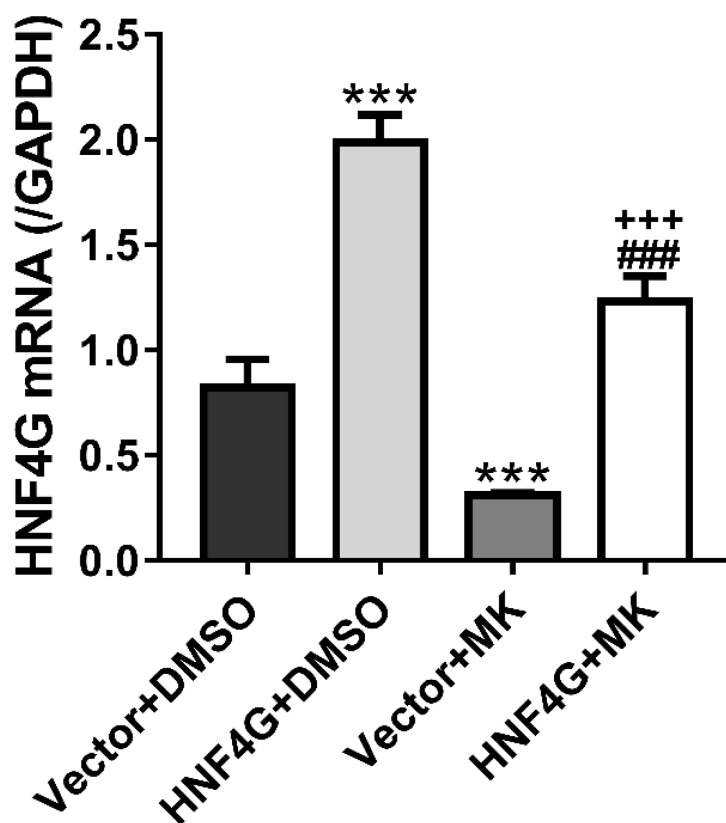

**Supplementary Figure 1:** A549 cells were infected with control virus (Vector) or HNF4G virus. HNF4G mRNA expression was determined in the presence of either DMSO or AKT inhibitor (MK-2206, 2  $\mu$ M). \*\*\* $P$  < 0.001 versus Vector+DMSO; ### $P$  < 0.001 versus HNF4G+DMSO; +++ $P$  < 0.001 versus Vector+MK-2206.
